# Supplementary material for: A novel polymeric AgI complex consisting of two three-dimensional networks which are enantiometric and interpenetrating
Source: Royal Society of Chemistry journal article supplement (doi:10.1039/b003183f), 2000-01-01
Supplement: b003183f.doc [file b003183f.doc]

**Supporting Information for:**

**Novel polymeric AgI complex consisting of two three-dimensional networks which are enantiometric and interpenetrating**

Xian-He Bu,* Kumar Biradha, Tadashi Yamaguchi, Mayumi Nishimura, Tasuku Ito,* Kentaro Tanaka and Mitsuhiko Shionoya*

Experimental Procedure for complex **1**:

A solution of AgNO3 (26 mg, 0.15 mmol, Wako) in CH3CN (5 mL) was carefully layered on top of a solution of **L** (38 mg, 0.1 mmol) in CH2Cl2 (8 mL) in a glass tube (1 cm diameter). The tube was sealed and kept in the dark for ca. two weeks. Yellow-orange colored crystal (58 mg, ca. 90%) which is suitable for X-ray crystallographic analysis appeared in the wall and bottom of the tube.
